# Supplementary material for: Identification of the Key Functional Domains of Bombyx mori Nucleopolyhedrovirus IE1 Protein
Source: MDPI journal article supplement (doi:10.3390/ijms231810276), 2022-09-07
Supplement: s1 [file s1]

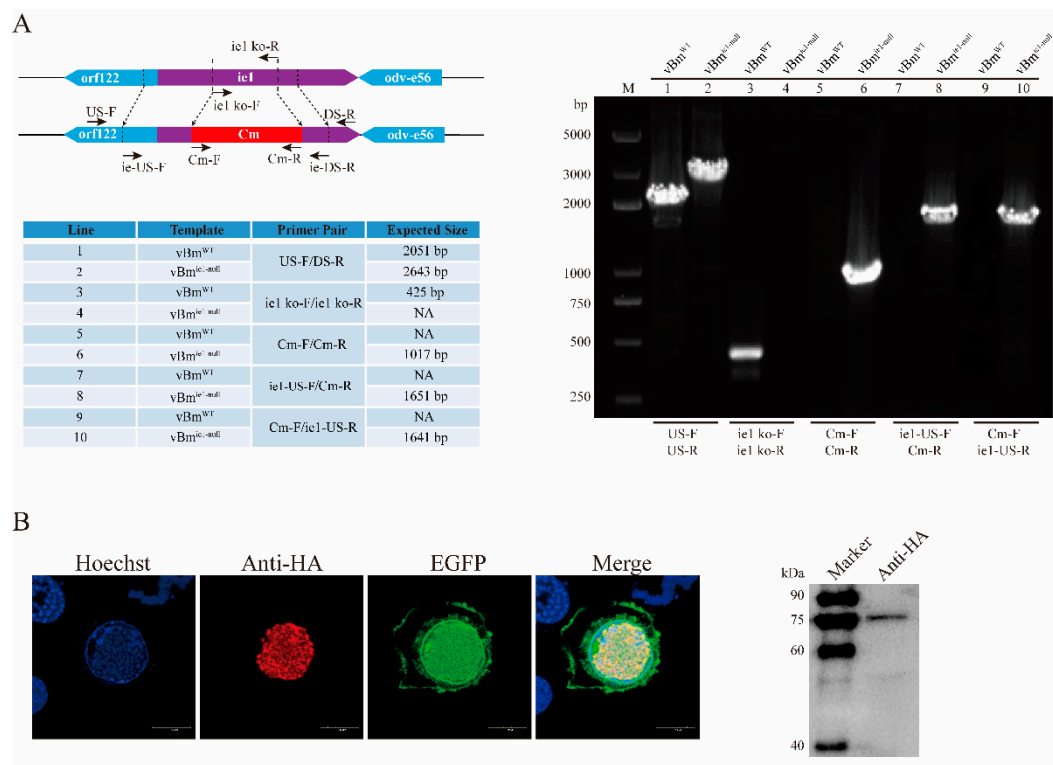

**Supplementary Figure S1.** Validation of the construction of IE1 deletion and IE1 repair viruses. **(A)** Validation of the construction of the IE1 deletion virus. Different primers were designed, as shown in the top left panel of Figure S1A, which were then combined, with the expected product sizes listed in the lower left panel of Figure S1A. Different DNA fragments were amplified using vBm<sup>WT</sup> or vBm<sup>ie1-null</sup> bacmids as templates by the corresponding primer pair to determine whether the IE1 deletion virus was successfully constructed. **(B)** Validation of the construction of the IE1 repair virus. vBm<sup>ie1-null</sup>-IE1(HA) bacmids were transfected into BmN-SWU1 cells. At 72 h p.t., Immunofluorescence and western blotting were performed to verify the expression of IE1.

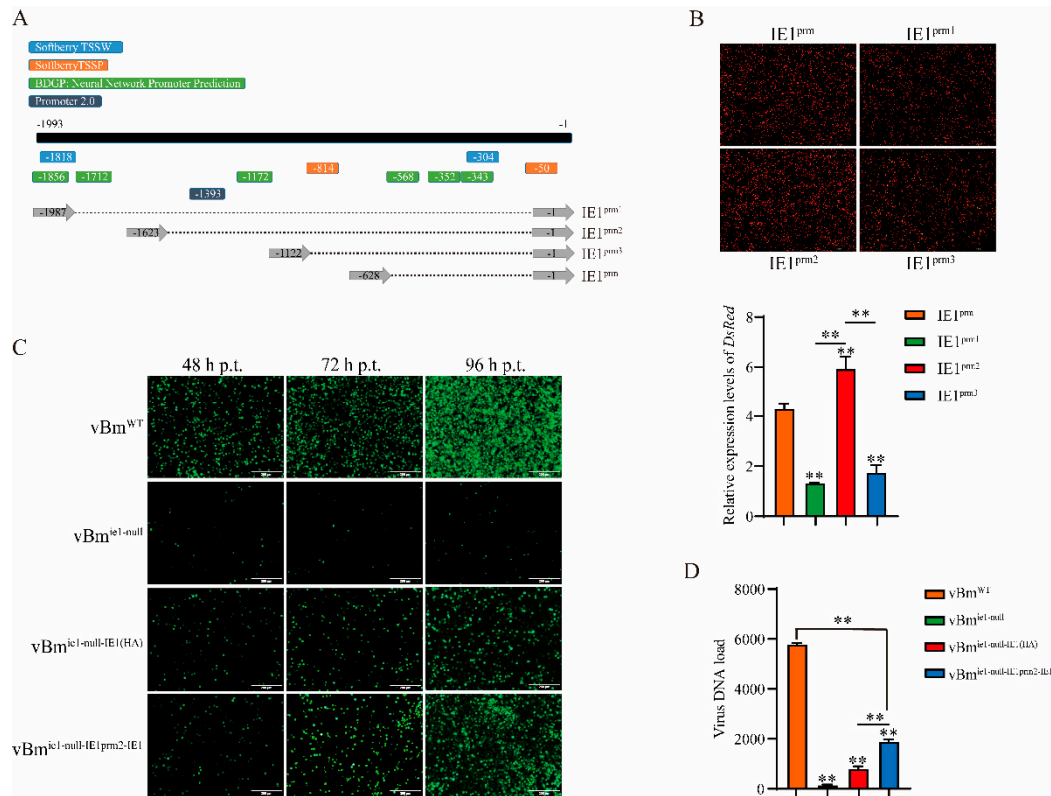

**Supplementary Figure S2.** Effect of promoter activity on the efficiency of IE1 repair. **(A)** Prediction of the IE1 promoter based on promoter prediction software. According to predictions from the websites Softberry TSSW, Softberry TSSP, and BDGP: Neural Network Promoter Prediction and Promoter 2.0, three promoters of different lengths were selected, namely, IE1<sup>prm1</sup> (-1 to -1987), IE1<sup>prm2</sup> (-1 to -1623), IE1<sup>prm3</sup> (-1 to -1122). The promoter IE1<sup>prm</sup> (-1 to -628) is the commercial IE1 promoter used in the previous section. **(B)** Promoter activity of different IE1 promoters. The promoter IE1<sup>prm1</sup>, IE1<sup>prm2</sup>, IE1<sup>prm3</sup>, or IE1<sup>prm</sup> was used to construct the reporter vector pSL1180-IE1<sup>prm1</sup>-DsRed, pSL1180-IE1<sup>prm2</sup>-DsRed, pSL1180-IE1<sup>prm3</sup>-DsRed, or pSL1180-IE1<sup>prm</sup>-DsRed, respectively. DsRed-positive cells were observed by fluorescence microscopy and the transcriptional levels of *DsRed* were examined at 48 h p.t. to determine the activity of the IE1 promoter (\*\**p* < 0.01). **(C)** Fluorescence observation of BmN-SWU1 cells. vBm<sup>WT</sup>, vBm<sup>ie1-null</sup>, vBm<sup>ie1-null-IE1(HA)</sup>, and vBm<sup>ie1-null-IE1prm2-IE1</sup> bacmids were transfected into BmN-SWU1 cells, respectively. At 48, 72, and 96 h p.t., EGFP-positive cells were observed by fluorescence microscopy. **(D)** The virus DNA load in BmN-SWU1 cells transfected with vBm<sup>WT</sup>, vBm<sup>ie1-null</sup>, vBm<sup>ie1-null-IE1(HA)</sup>, and vBm<sup>ie1-null-IE1prm2-IE1</sup> bacmids at 72 h p.t. (\*\**p* < 0.01).

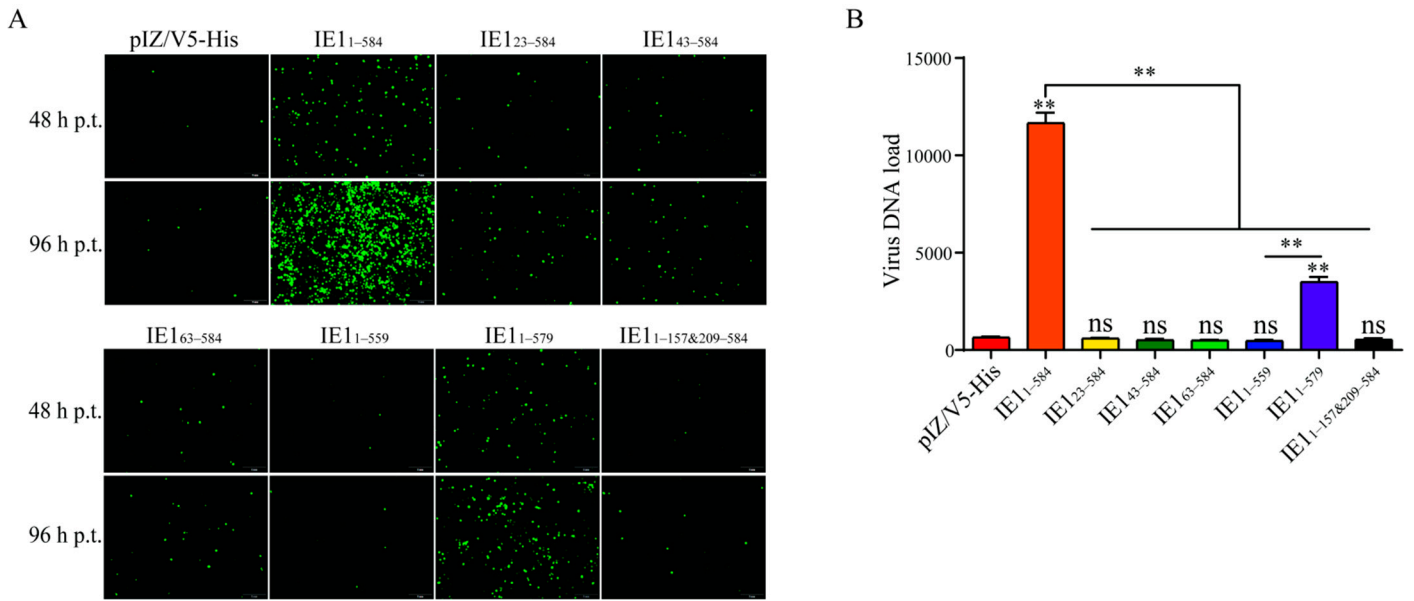

**Supplementary Figure S3.** Effect of IE1 truncation mutants on the proliferation of BmNPV. **(A)** Fluorescence observation of BmN-SWU1 cells. The plasmid pIZ-IE1<sub>1-584</sub>, pIZ-IE1<sub>23-584</sub>, pIZ-IE1<sub>43-584</sub>, pIZ-IE1<sub>63-584</sub>, pIZ-IE1<sub>1-559</sub>, pIZ-IE1<sub>1-579</sub>, or pIZ-IE1<sub>1-157&209-584</sub> was co-transfected with the *ie-1* deletion bacmid vBm<sup>ie1-null</sup>. At 48 and 96 h p.t., EGFP-positive cells were observed by fluorescence microscope to determine the proliferation of BmNPV. **(B)** The virus DNA load in BmN-SWU1 cells co-transfected with IE1 truncation mutants and vBm<sup>ie1-null</sup> bacmids at 96 h p.t. (ns, no significance; \*\* $p < 0.01$ ).

**Supplementary Table S1.** The GeneBank Access Numbers of IE1 used in this study.

| Species                                                    | Protein Description | GeneBank Access Number |
|------------------------------------------------------------|---------------------|------------------------|
| <i>Dendrolimus kikuchii</i> nucleopolyhedrovirus           | DekiNPV IE1         | AFS51887.1             |
| <i>Thysanoplusia orichalcea</i> nucleopolyhedrovirus       | ThorNPV IE1         | YP_007250550.1         |
| <i>Maruca vitrata</i> nucleopolyhedrovirus                 | MaviNPV IE1         | YP_950845.1            |
| <i>Bombyx mandarina</i> nucleopolyhedrovirus               | BomaNPV IE1         | ACQ57320.1             |
| <i>Bombyx mori</i> nucleopolyhedrovirus                    | BmNPV IE1           | NP_047544.1            |
| <i>Rachiplusia ou</i> multiple nucleopolyhedrovirus        | RoMNPV IE1          | AAN28024.1             |
| <i>Autographa californica</i> nucleopolyhedrovirus         | AcMNPV IE1          | NP_054178.1            |
| <i>Antheraea yamamai</i> nucleopolyhedrovirus              | AnyaNPV IE1         | BBD50465.1             |
| <i>Antheraea pernyi</i> nucleopolyhedrovirus               | AnpeNPV IE1         | YP_610980.1            |
| <i>Epiphyas postvittana</i> nucleopolyhedrovirus           | EppoNPV IE1         | NP_203298.1            |
| <i>Anticarsia gemmatalis</i> multiple nucleopolyhedrovirus | AngeMNPV IE1        | YP_009316031.1         |
| <i>Hyphantria cunea</i> nucleopolyhedrovirus               | HycuNPV IE1         | YP_473198.1            |
| <i>Choristoneura murinana</i> nucleopolyhedrovirus         | ChmuNPV IE1         | YP_008992101.1         |
| <i>Choristoneura rosaceana</i> nucleopolyhedrovirus        | ChroNPV IE1         | YP_008378363.1         |
| <i>Spodoptera litura</i> nucleopolyhedrovirus              | SpliNPV IE1         | NP_258284.1            |
| <i>Leucania separata</i> nucleopolyhedrovirus              | LeseNPV IE1         | YP_758313.1            |
| <i>Spodoptera cosmioides</i> nucleopolyhedrovirus          | SpcoNPV IE1         | QEI03567.1             |
| <i>Spodoptera litura</i> nucleopolyhedrovirus II           | SpliNPV IE1 II      | YP_002332837.1         |
| <i>Spodoptera exigua</i> multiple nucleopolyhedrovirus     | SeMNPV IE1          | AYN45080.1             |
| <i>Spodoptera frugiperda</i> multiple nucleopolyhedrovirus | SfMNPV IE1          | YP_001036428.1         |
| <i>Agrotis segetum</i> nucleopolyhedrovirus B              | AgseNPV IE1 B       | YP_009112704.1         |
| <i>Agrotis ipsilon</i> multiple nucleopolyhedrovirus       | AgipMNPV IE1        | YP_002268183.1         |
| <i>Agrotis segetum</i> nucleopolyhedrovirus A              | AgseNPV IE1 A       | YP_529816.1            |
| <i>Mamestra brassicae</i> multiple nucleopolyhedrovirus    | MabrMNPV IE1        | YP_009011216.1         |
| <i>Helicoverpa armigera</i> multiple nucleopolyhedrovirus  | HearMNPV IE1        | ACH88677.1             |
| <i>Mamestra configurata</i> nucleopolyhedrovirus A         | MacoNPV IE1 A       | QGX02407.1             |
| <i>Mythimna unipuncta</i> nucleopolyhedrovirus             | MyunNPV IE1         | YP_009666803.1         |
| <i>Helicoverpa armigera</i> nucleopolyhedrovirus           | HearNPV IE1         | ALD88580.1             |
| <i>Helicoverpa armigera</i> nucleopolyhedrovirus G4        | HearNPV IE1 G4      | NP_075083.1            |
| <i>Helicoverpa zea</i> single nucleopolyhedrovirus         | HzSNPV IE1          | AAB54100.1             |
| <i>Ectropis obliqua</i> nucleopolyhedrovirus               | EcobNPV IE1         | YP_874199.1            |
| <i>Orgyia leucostigma</i> nucleopolyhedrovirus             | OrleNPV IE1         | YP_001650917.1         |
| <i>Apocheima cinerarium</i> nucleopolyhedrovirus           | ApciNPV IE1         | YP_006607883.1         |
| <i>Euproctis pseudoconspersa</i> nucleopolyhedrovirus      | EupsNPV IE1         | YP_002854618.1         |
| <i>Adoxophyes orana</i> nucleopolyhedrovirus               | AdorNPV IE1         | YP_002300536.1         |
| <i>Adoxophyes honmai</i> nucleopolyhedrovirus              | AdhoNPV IE1         | NP_818666.1            |
| <i>Trichoplusia ni</i> single nucleopolyhedrovirus         | TrniSNPV IE1        | AAL14888.2             |
| <i>Chrysodeixis chalcites</i> nucleopolyhedrovirus         | ChchNPV IE1         | YP_249620.1            |
| <i>Lymantria dispar</i> multiple nucleopolyhedrovirus      | LdMNPV IE1          | ANS70904.1             |

|                                                 |             |                |
|-------------------------------------------------|-------------|----------------|
| <i>Lymantria xylin</i> a nucleopolyhedrovirus   | LyxyNPV IE1 | YP_003517752.1 |
| <i>Hemileuca sp.</i> nucleopolyhedrovirus       | HespNPV IE1 | YP_008378231.1 |
| <i>Buzura suppressaria</i> nucleopolyhedrovirus | BusuNPV IE1 | YP_009001791.1 |
| <i>Clanis bilineata</i> nucleopolyhedrovirus    | ClbiNPV IE1 | YP_717545.1    |
| <i>Diatraea saccharalis</i> granulovirus        | DisaGV IE1  | YP_009182204.1 |
| <i>Adoxophyes orana</i> granulovirus            | AdorGV IE1  | NP_872460.1    |
| <i>Cydia pomonella</i> granulovirus             | CypoGV IE1  | NP_148791.1    |
| <i>Cryptophlebia leucotreta</i> granulovirus    | CrleGV IE1  | NP_891854.1    |
| <i>Erinnyis ello</i> granulovirus               | ErelGV IE1  | YP_009091847.1 |
| <i>Artogeia rapae</i> granulovirus              | ArraGV IE1  | YP_003429330.1 |
| <i>Pieris rapae</i> granulovirus                | PiraGV IE1  | AGS18772.1     |
| <i>Epinotia aporema</i> granulovirus            | EpapGV IE1  | YP_006908543.1 |
| <i>Hyphantria cunea</i> granulovirus            | HycuGV IE1  | QBQ01559.1     |
| <i>Agrotis segetum</i> granulovirus             | AgseGV IE1  | YP_009513039.1 |
| <i>Spodoptera frugiperda</i> granulovirus       | SfGV IE1    | YP_009121793.1 |
| <i>Mocis latipes</i> granulovirus               | MolaGV IE1  | YP_009249846.1 |
| <i>Pseudalattia unipuncta</i> granulovirus      | PsunGV IE1  | YP_003422347.1 |
| <i>Xestia c-nigrum</i> granulovirus             | XcGV IE1    | NP_059157.1    |
| <i>Helicoverpa armigera</i> granulovirus        | HearGV IE1  | YP_001648990.1 |

**Supplementary Table S2.** The primers used to construct IE1 deletion and IE1 repair viruses.

| Primer name       | Primer sequence                                                     |
|-------------------|---------------------------------------------------------------------|
| ie1-US-F (XhoI)   | CCGCTCGAGGGACCTTGTGCTTTTGG                                          |
| ie1-US-R (KpnI)   | GGGGTACCGTCTCGCTGTCAGATACTA                                         |
| ie1-DS-F (BamHI)  | CGGGATCCCGCCGTATTTGATGCGTTTC                                        |
| ie1-DS-R (EcoRI)  | CGGAATTCGGGGATTGTCTGGGAACT                                          |
| Cm-F (KpnI)       | GGGGTACCTGTGTAGGCTGGAGCTGCT                                         |
| Cm-R (BamHI)      | CGGGATCCTCCATATGAATATCCTCC                                          |
| US-F              | AATCCTTGGCGTAGAA                                                    |
| DS-R              | TCGCCAGAAATCCAATA                                                   |
| ie1-ko-F          | TGCAGCAGCTTCAAAC                                                    |
| ie1-ko-R          | CAAAATCATTAGTAAAA                                                   |
| IE1prm-F (BamHI)  | CGGGATCCTTGCAGTTCGGGAC                                              |
| IE1prm2-F (BamHI) | CGGGATCCAACAAAGCAGACACTCGGCA                                        |
| IE1-R (SpeI)      | GGACTAGTTTAAGCGTAATCTGGAACATCGTATGGG-<br>TAATTAAATTCAATTTTTTATATTTA |
| M13-F             | CGCCAGGGTTTTCCAGTCACGAC                                             |
| M13-R             | CAGGAAACAGCTATGACC                                                  |

The sequences in italics and bold were restriction enzyme sites, bold sequences were HA tag sequences.

**Supplementary Table S3.** The primers used to construct IE1 truncated mutants.

| Primer name      | Primer sequence                                     |
|------------------|-----------------------------------------------------|
| IE1-F (BamHI)    | <i>CGGGATCC</i> ATGACGCAAATTAATTTTAACG              |
| IE1-R (XhoI)     | CCGCTCGAGATTA <del>AAAT</del> CAATTTTTTTATATTTACAAT |
| HA-F (XhoI)      | CCGCTCGAGTACCCATACGATGTTCCAGATTACGCTTAAT            |
| HA-R (XbaI)      | GCTCTAGATTAAAGCGTAATCTGGAACATCGTATGGGTAC            |
| IE1-258R (EcoRI) | CGGAATTCGTAATAGTTGTTTGT                             |
| IE1-208R (EcoRI) | CGGAATTCGTCGTCGAAACGCATC                            |
| IE1-157R (EcoRI) | CGGAATTC <del>CAATTT</del> ATTCTT                   |
| IE1-158F (BamHI) | <i>CGGGATCC</i> ATGAAGCCTAAATACAAGAAAAG             |
| IE1-209F (BamHI) | <i>CGGGATCC</i> ATGAACGACTACAATTCCAACAGGT           |
| IE1-209F (EcoRI) | CGGAATTCATGAACGACTACAATTCCAACAGGT                   |
| IE1-259F (EcoRI) | CGGAATTCATGGTAGATAATCGTGT                           |
| IE1-309F (EcoRI) | CGGAATTCATGTTTGTTCGATGTGCAT                         |
| IE1-369F (EcoRI) | CGGAATTCATGCCTTAGTCGTAAAGAGAGT                      |
| IE1-429F (EcoRI) | CGGAATTCATGAAATACAGTAGTG                            |
| IE1-479F (EcoRI) | CGGAATTCATGAATGTAAAAGGTCAC                          |
| IE1-539F (EcoRI) | CGGAATTCATGCGAAGAGAGAGCACT                          |
| IE1-560F (EcoRI) | CGGAATTCCTGGTTCCGTTGTCC                             |
| IE1-23F (BamHI)  | <i>CGGGATCC</i> ATGAACGGCTATTCAGAGT                 |
| IE1-43F (BamHI)  | <i>CGGGATCC</i> ATGAATCCCACGCCGG                    |
| IE1-63F (BamHI)  | <i>CGGGATCC</i> ATGAAC <del>TTTT</del> TGGCAAGCGTCA |
| IE1-83F (BamHI)  | <i>CGGGATCC</i> ATGAAGACCACTGATAATCTCGGA            |
| IE1-138F (BamHI) | <i>CGGGATCC</i> ATGCTGGACGAATACTTGGAC               |
| IE1-158F (BamHI) | <i>CGGGATCC</i> ATGAAGCCTAAATACAAGAAAAG             |
| IE1-579R (XhoI)  | CCGCTCGAGTTTATATTTACAA                              |
| IE1-559R (XhoI)  | CCGCTCGAGACCCTGTAATATTAAAGCTA                       |
| IE1-517R (XhoI)  | CCGCTCGAGAGCGTCTACATCTTT                            |

The sequences in italics and bold were restriction enzyme sites, bold sequences were HA tag sequences.

**Supplementary Table S4.** The primers used for qRT-PCR.

| Primer name  | Primer sequence        |
|--------------|------------------------|
| RT-me53-F    | CACAAAGAGCCCAACGAGC    |
| RT-me53-R    | GCCGCCGTCCAATACCTC     |
| RT-gp64-F    | CACCATCGTGGAGACGGACTAC |
| RT-gp64-R    | ACCTCGCACTGCTGCCTGA    |
| RT-vp39 -F   | AGACACCACAAACCCGAACAC  |
| RT-vp39 -R   | TTGATCGCCAACACCACCT    |
| RT-p10-F     | AGACGCCATTGCGGAAAC     |
| RT-p10-R     | CGGGCAAACCGTCCAAAG     |
| RT-gp41-F    | ATGTTGATGTGCGGAAAGC    |
| RT-gp41-R    | GTGGCGGAATCGGTGA       |
| RT-DsRed-F   | GAGACCCACAAGGCCCTGA    |
| RT-DsRed-R   | CGGTGCGCTCGTACTGCT     |
| RT-SW22934-F | TTCGTACTGGCTCTTCTCGT   |
| RT-SW22934-R | CAAAGTTGATAGCAATTCCT   |
